# Supplementary material for: Organic field-effect transistors based on novel organic semiconductors containing diazaboroles
Source: Royal Society of Chemistry journal article supplement (doi:10.1039/c1jm00002k), 2011-01-01
Supplement: c1jm00002k.pdf [file c1jm00002k.pdf]

**Organic Electronic Devices Based on Novel Organics  
Containing Diazaborole Rings**      **semiconductor**

**Supporting Information**

*Takahiro Kojima, <sup>a</sup>Jun-ichi Nishida, <sup>a</sup>Daisuke Kumaki, <sup>b</sup>Shizuo Tokito, <sup>b</sup>  
and Yoshiro Yamashita. <sup>\*a</sup>*

<sup>a</sup>Department of Electronic Chemistry, Interdisciplinary Graduate School of Science and Engineering, Tokyo Institute of Technology, Nagatsuta, Midori-ku, Yokohama 226-8502, Japan.

<sup>b</sup>Technical Research Laboratories, Kinuta, Setagaya-ku, Tokyo 157-8510, Japan.

E-mail: [yoshiro@echem.titech.ac.jp](mailto:yoshiro@echem.titech.ac.jp)

## Contents

- Output and transfer characteristics of  
the bottom-contact FET devices of **2-6**.----- p.3-8

(a)HMDSr.t.

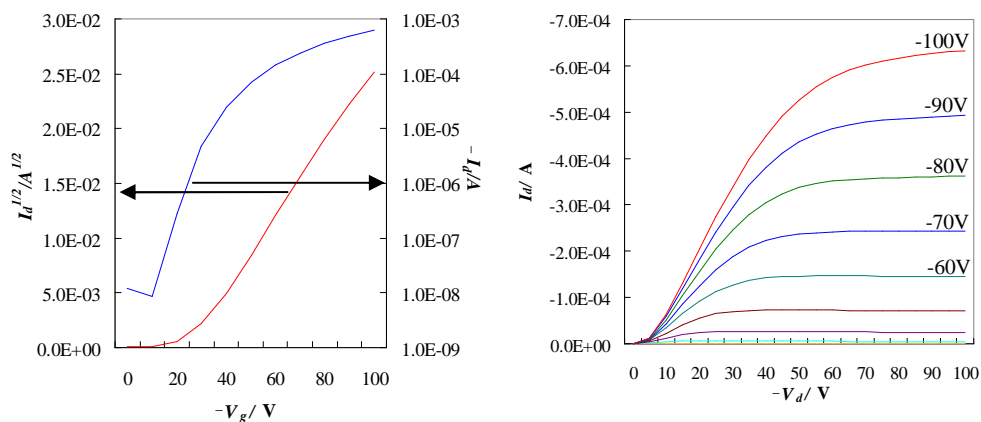

(b)Bare80 °C

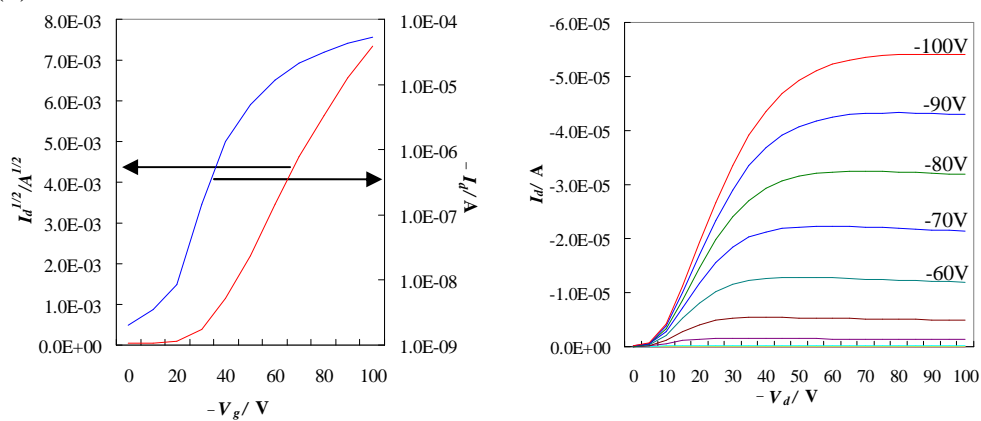

(c)HMDS80 °C

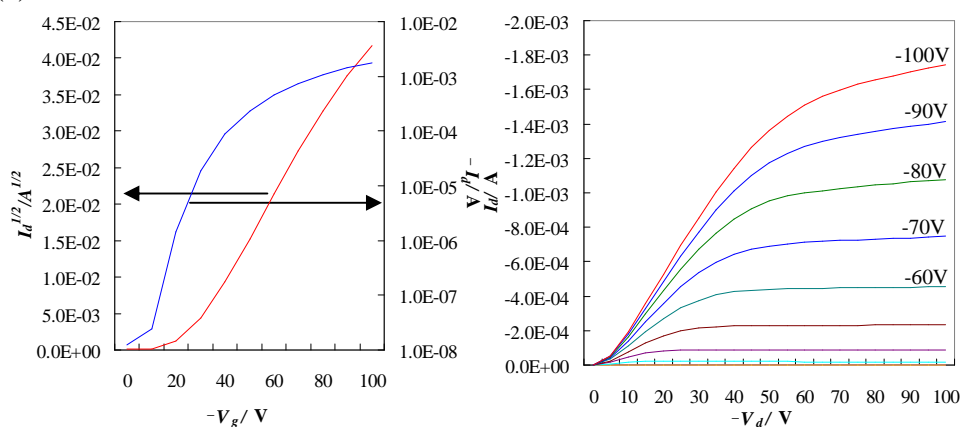

**FigureS1.** Output and transfer characteristics of the bottom-contact FET devices of **2** deposited on the (a) HMDS treated substrate at r.t., (b) bare substrate at 80 °C and (c) HMDS treated substrate at 80 °C.

(a)Barer.t.

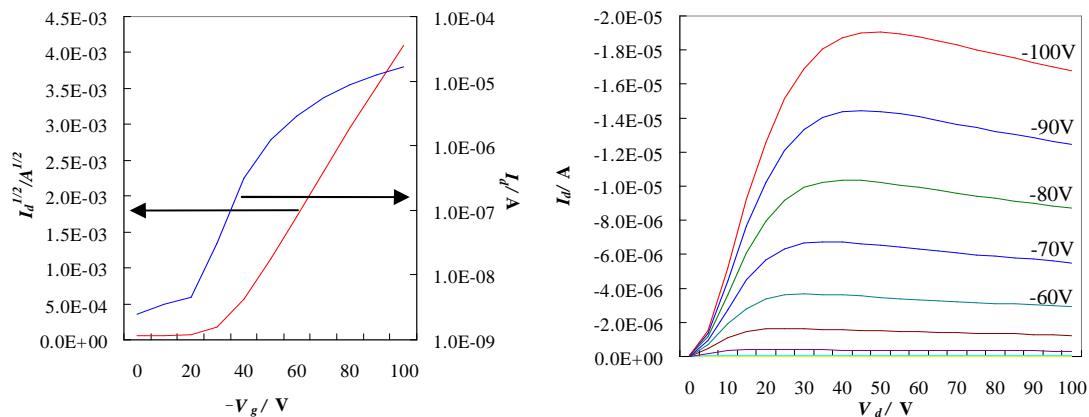

(b)HMDSr.t.

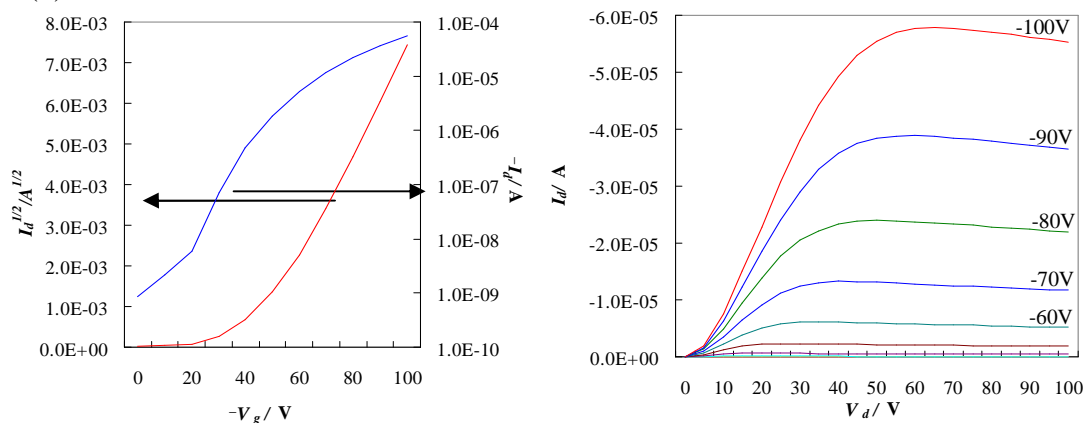

**Figure S2.** Output and transfer characteristics of the bottom- contact FET devices of **3** deposited on the bare substrate at r.t. (a), HMDS treated substrate at r.t. (b).

(a)Barer.t.

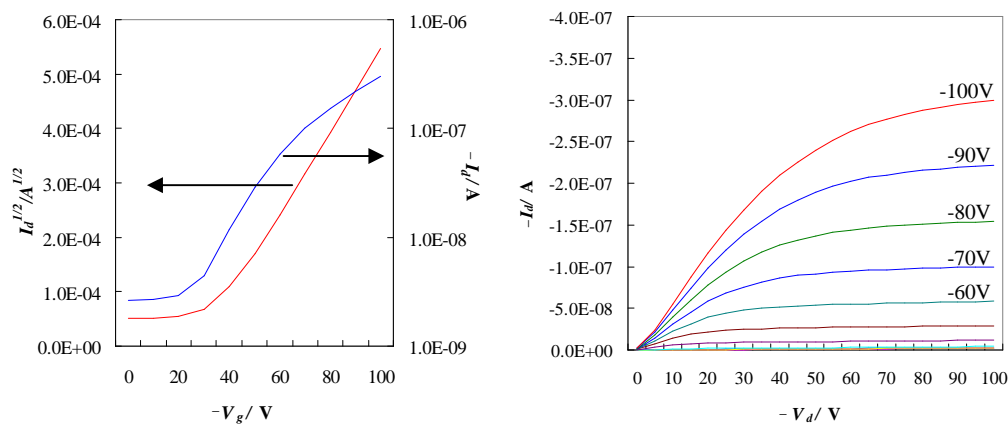

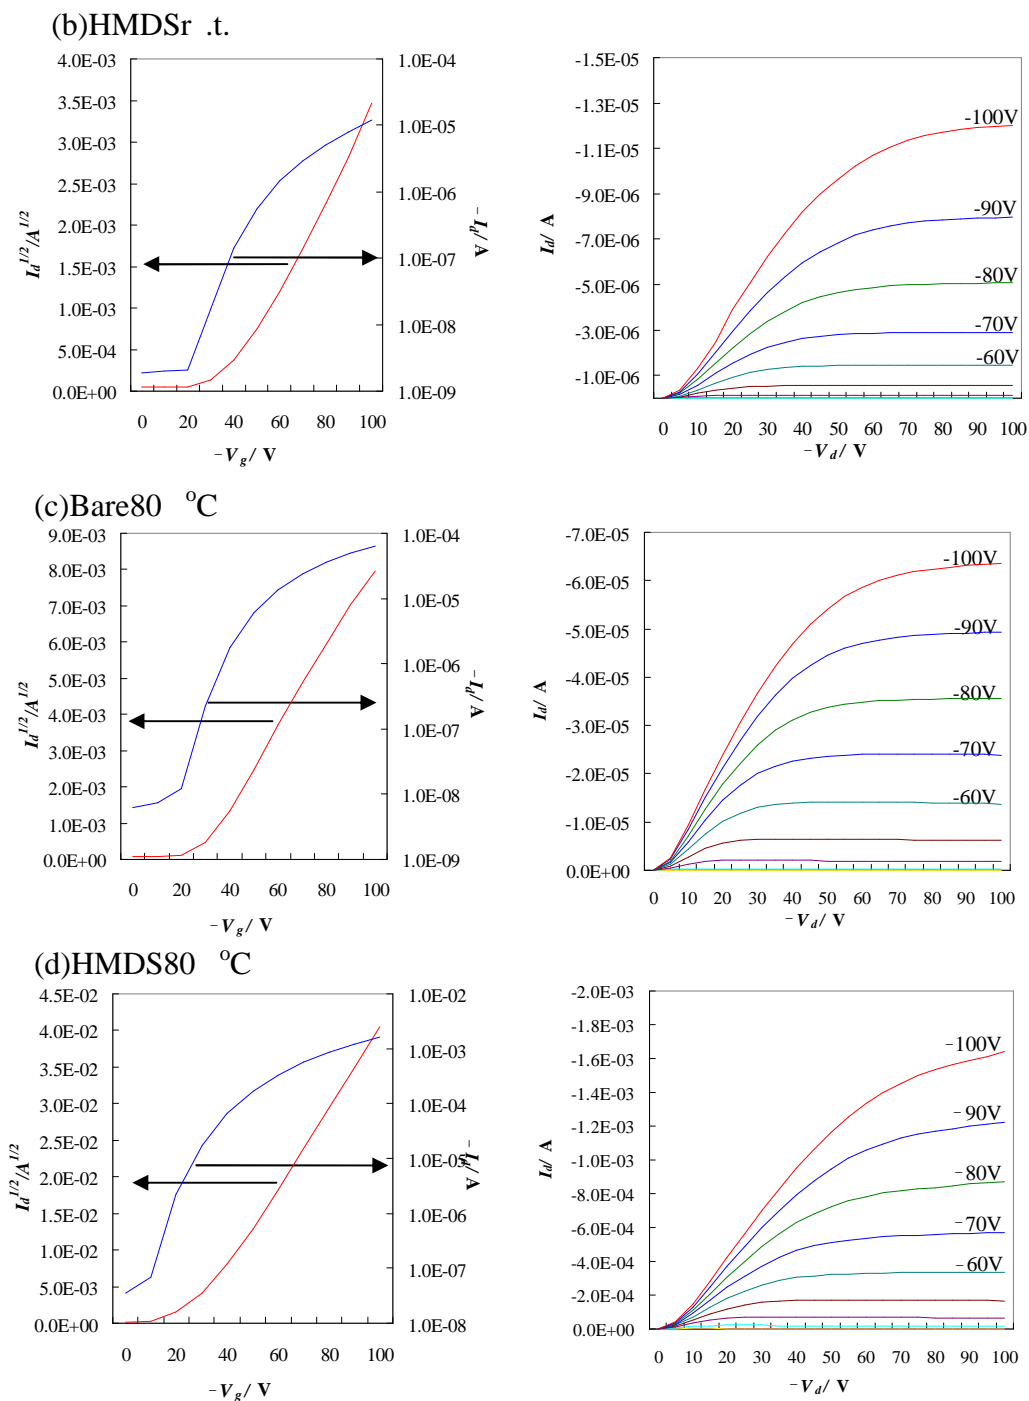

**Figure S3.** Output and transfer characteristics of the bottom- contact FET devices of **4** deposited on the bare substrate at r.t. (a), HMDS treated substrate at r.t. (b), bare substrate at 80 °C (c) and HMDS treated substrate at 80 °C (d).

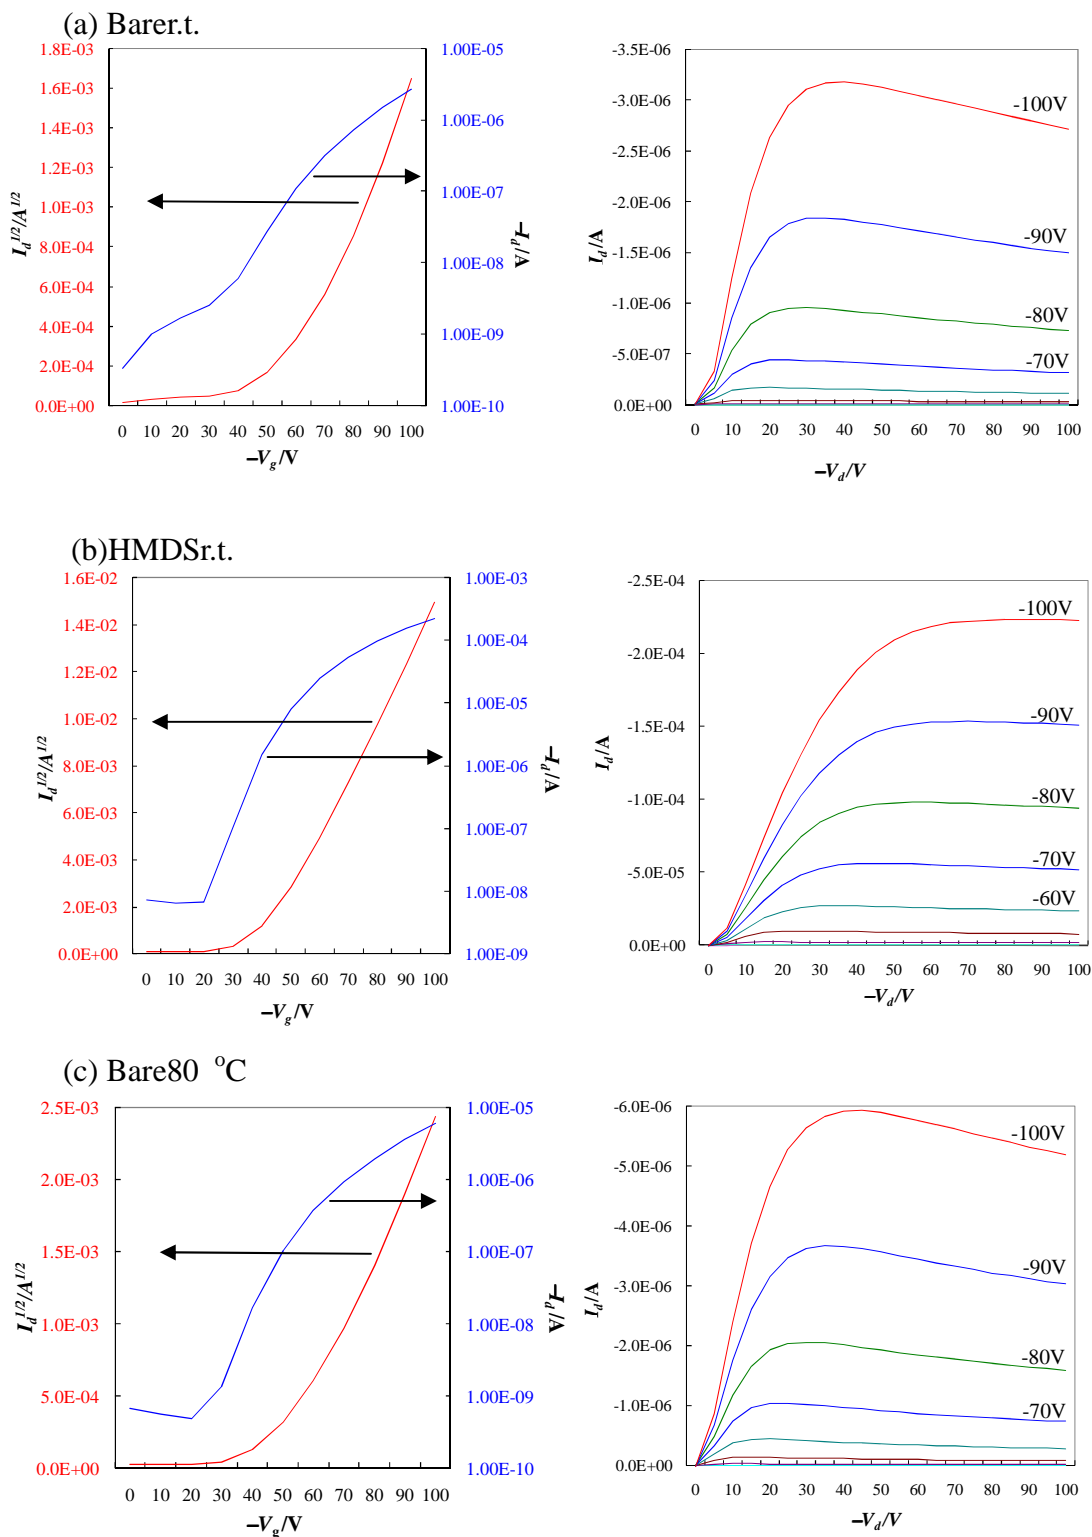

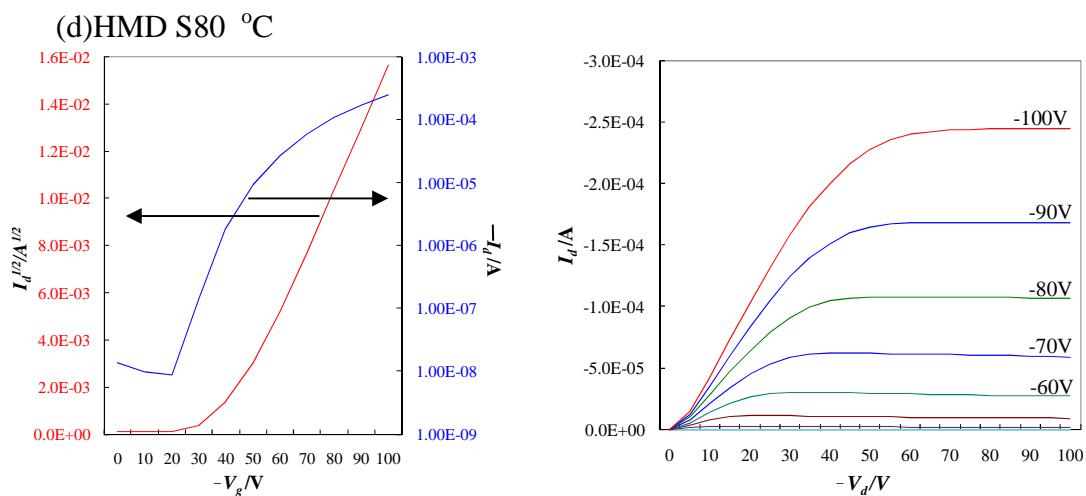

**FigureS4.** Output and transfer characteristics of the bottom-contact FET devices of 5 deposited on the bare substrate at r.t. (a), HMDS treated substrate at r.t. (b), bare substrate at 80 °C (c), and HMDS treated substrate at 80 °C (d).

(a) Bare r.t.

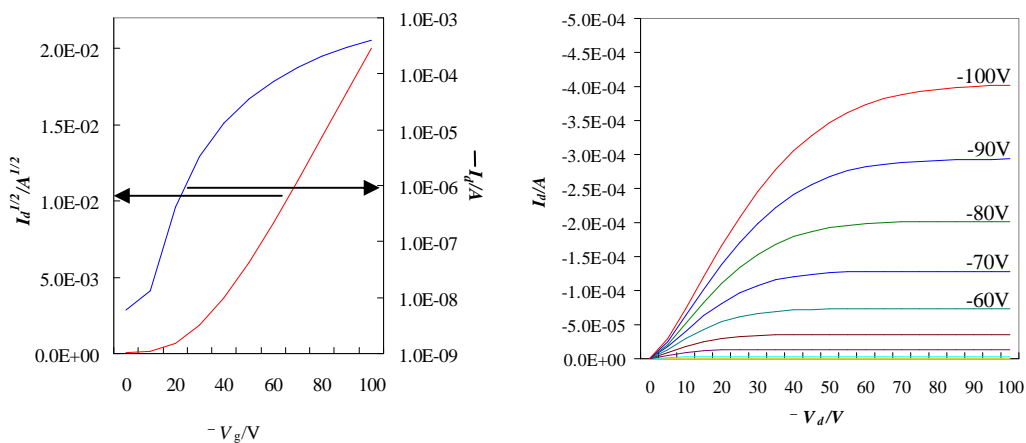

(b) HMDS r.t.

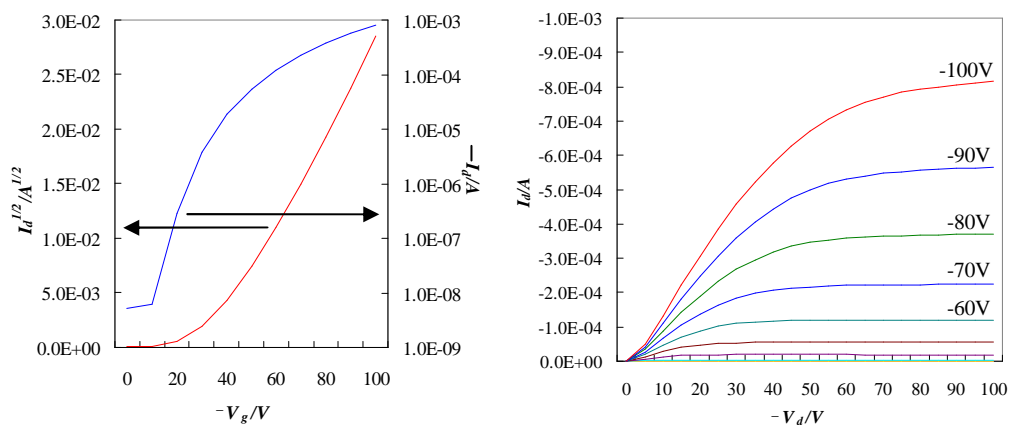

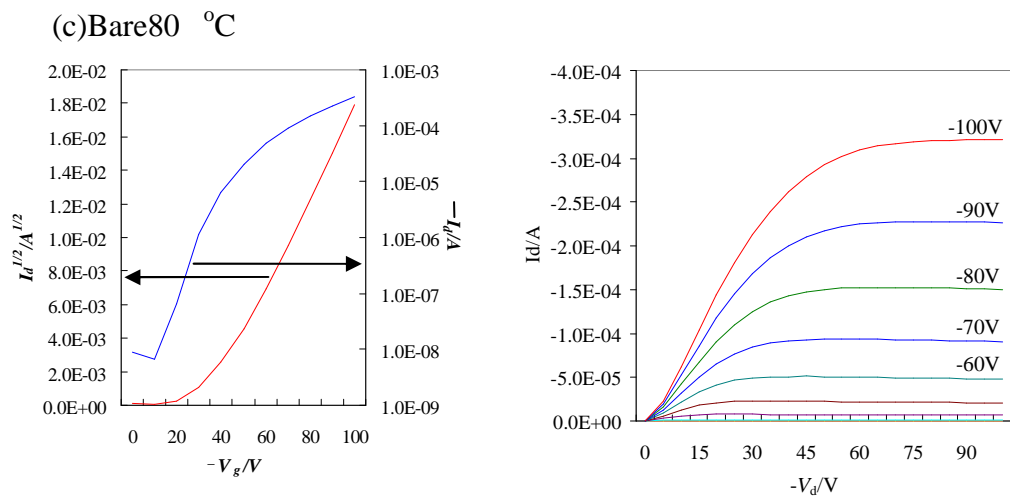

**Figure S5.** Output and transfer characteristics of the FET devices of **6** deposited on the bare substrate at r.t. (a), HMDS treated substrate at r.t. (b) and bare substrate at 80 °C (c).
